# Supplementary material for: Protein tyrosine phosphatase non-receptor 22 and C-Src tyrosine kinase genes are down-regulated in patients with rheumatoid arthritis
Source: PubMed Central journal article supplement (PMC5585411; doi:10.1038/s41598-017-10915-9), 2017-09-05

***Protein tyrosine phosphatase non-receptor 22 and C-Src tyrosine kinase genes down-regulated in patients with rheumatoid arthritis***

Sara Remuzgo-Martínez, PhD<sup>1,†</sup>, Fernanda Genre, PhD<sup>1,†</sup>, Santos Castañeda, MD, PhD<sup>2</sup>, Alfonso Corrales, MD, PhD<sup>1</sup>, Pablo Moreno-Fresneda, MD<sup>2</sup>, Begoña Ubilla, BSc<sup>1</sup>, Verónica Mijares, BSc<sup>1</sup>, Virginia Portilla, BSc<sup>1</sup>, Jesús González-Vela, BSc<sup>1</sup>, Trinitario Pina, MD, PhD<sup>1</sup>, Gonzalo Ocejo-Vinyals, MD, PhD<sup>3</sup>, Juan Irure-Ventura, BSc<sup>3</sup>, Ricardo Blanco, MD, PhD<sup>1</sup>, Javier Martín, MD, PhD<sup>4</sup>, Javier Llorca, MD, PhD<sup>5</sup>, Raquel López-Mejías, PhD<sup>1,\*</sup>, and Miguel A. González-Gay, MD, PhD<sup>1,6,\*</sup>.

**Supplementary table 1. Differential *PTPN22* and *CSK* mRNA expression between healthy controls and RA patients according to their haplotypes.**

|                                                               | Haplotypes | mRNA expression<br>controls vs RA patients<br>(mean ± SD) | P-value |
|---------------------------------------------------------------|------------|-----------------------------------------------------------|---------|
| <b><i>PTPN22</i> Haplotypes<br/>(rs2488457 and rs2476601)</b> | CG         | 4.62 ± 1.55 vs 4.11 ± 1.60                                | 0.89    |
|                                                               | GA         | 4.76 ± 1.07 vs 3.80 ± 1.26                                | 0.007   |
|                                                               | GG         | 4.79 ± 1.71 vs 4.17 ± 1.76                                | 0.63    |
| <b><i>CSK</i> Haplotypes<br/>(rs34933034 and rs1378942)</b>   | GA         | 3.13 ± 0.94 vs 2.47 ± 0.74                                | <0.0001 |
|                                                               | GC         | 3.72 ± 1.10 vs 2.41 ± 0.78                                | <0.0001 |
|                                                               | AC         | 3.14 ± 1.01 vs 2.69 ± 0.79                                | 0.056   |

**Supplementary table 2. Demographic and clinical characteristics of controls and RA patients enrolled in the study.**

|                                                       | Healthy controls, n=43 | RA patients, n=89 |
|-------------------------------------------------------|------------------------|-------------------|
| Women, n (%)                                          | 26 (60.5)              | 68 (76.4)         |
| Age at time of study (years, mean±SD)                 | 50.5 ± 14.0            | 63.2 ± 11.6       |
| Disease duration (years, mean±SD)                     | -                      | 11.5 ± 10.5       |
| Rheumatoid factor positive, n (%)                     | -                      | 52 (58.4)         |
| Anti-CCP antibodies positive, n (%)                   | -                      | 55 (61.8)         |
| Erosions, n (%)                                       | -                      | 44 (49.4)         |
| Extra-articular manifestations*, n (%)                | -                      | 15 (16.9)         |
| CRP (mg/l) at RA onset (mean±SD)                      | -                      | 16.1 ± 20.6       |
| ESR (mm/1 <sup>st</sup> h) at RA onset (mean±SD)      | -                      | 34.5 ± 29.2       |
| CRP (mg/l) at time of study (mean±SD)                 | 2.4 ± 3.0              | 6.7 ± 8.8         |
| ESR (mm/1 <sup>st</sup> h) at time of study (mean±SD) | 13.5 ± 11.9            | 19.2 ± 20.7       |
| Ischemic heart disease, n (%)                         | 0 (0.0)                | 16 (18.0)         |
| Cardiovascular risk factors                           |                        |                   |
| Hypertension, n (%)                                   | 7 (16.28)              | 47 (52.8)         |
| Dyslipidemia, n (%)                                   | 12 (27.9)              | 50 (56.2)         |
| Current smoking, n (%)                                | 16 (37.2)              | 31 (34.8)         |
| Diabetes, n (%)                                       | 0 (0.0)                | 10 (11.2)         |
| Obesity, n (%)                                        | 8 (18.6)               | 31 (34.8)         |

Anti-CCP: anti-cyclic citrullinated peptide antibodies; CRP: C-reactive protein; ESR: erythrocyte sedimentation rate; RA: rheumatoid arthritis; SD: standard deviation.

\*If patients experienced: nodular disease, Felty's syndrome, pulmonary fibrosis, rheumatoid vasculitis, or secondary Sjögren's syndrome.

**Supplementary table 3. Statistical power analysis.**

| <b>Group</b>                            | <b>Mean difference</b> | <b>Statistical power</b> |
|-----------------------------------------|------------------------|--------------------------|
| Major allele homozygous                 | 1 SD                   | 0.99                     |
|                                         | 2/3 SD                 | 0.87                     |
| Heterozygous or minor allele homozygous | 1 SD                   | 0.93                     |
|                                         | 2/3 SD                 | 0.73                     |

For estimating statistical power, a general scenario with 60% patients homozygous for the most frequent allele and 40% heterozygous or homozygous for the minor allele was considered. Then, two mean difference scenarios (mean difference equals to 1 SD and mean difference equals to 2/3 SD) were considered.

**Supplementary figure 1. Expression of CSK and PTPN22 in controls (a) and patients with rheumatoid arthritis (b).** Amplicons of each gene and a 50 base pairs (bp) DNA ladder were electrophoresed on 2% agarose gel. *Beta-actin (ACTB)* and *GAPDH* used as housekeeping genes were also included.

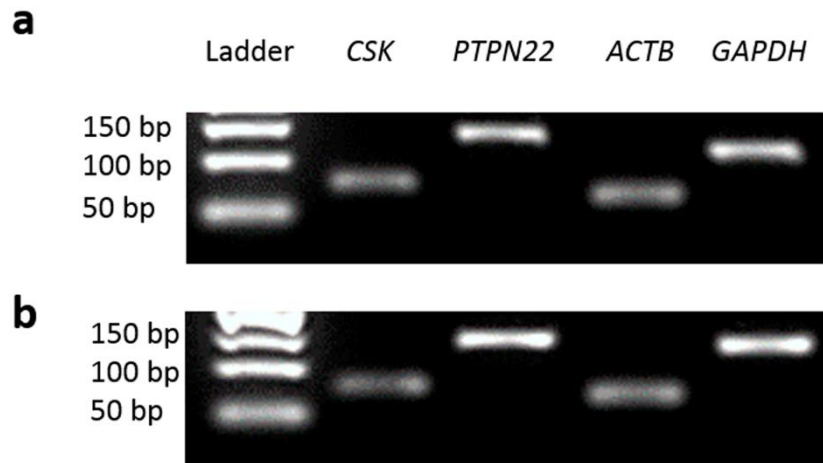

**Supplementary figure 2. Linkage disequilibrium (LD) plots (measured by  $r^2$ ) of the *PTPN22* and *CSK* polymorphisms (in European population) tested in our study.** Data obtained by 1000 genomes and Haploview v.4.2 software. The LD between the polymorphisms studied is shown in a scale from minimum (white) to maximum (black).

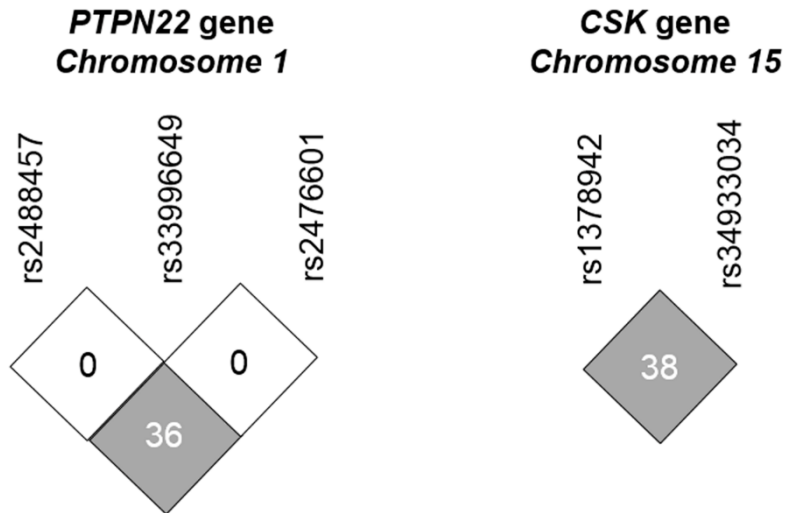

Supplement: 41598_2017_10915_MOESM1_ESM.pdf [file 41598_2017_10915_MOESM1_ESM.pdf]
